# Supplementary material
Source: PubMed Central journal article supplement (PMC6495533)
Supplement: NIHMS917287-supplement-Supp_info.pdf [file NIHMS917287-supplement-Supp_info.pdf]

**Web-based Supplementary Materials for  
Integrated Powered Density: Screening Ultrahigh Dimensional Covariates with  
Survival Outcomes**

**by Hyokyoun G. Hong, Xuerong Chen, David C. Christiani, and Yi Li**

## 1. Proof of the main results

We present several useful lemmas before proving the theoretical results in the main text.

LEMMA 1: For a categorical covariate  $X_j$  with  $R_j$  categories, let  $\hat{S}_{T|X_j}(t|r)$  be the Kaplan-Meier estimator of conditional survival function within the subsample  $X_j = r, r = 1, \dots, R_j$ . Under conditions (C1) and (C5), we have

$$P\left(\max_{1 \leq r \leq R_j} \sup_{t \in [0, \tau]} |\hat{S}_{T|X_j}(t|r) - S_{T|X_j}(t|r)| > \epsilon\right) \leq d_3 R \exp(-d_4 \epsilon^2 \theta_1^{25} n^{1-3\kappa}),$$

where  $d_3$  and  $d_4$  are positive constants,  $R = \max_{1 \leq j \leq p} R_j$ .

*Proof.* By the inequality in the last paragraph on page 1161 of Dabrowska (1989), we have

$$\begin{aligned} & P\left(\max_r \sup_{t \in [0, \tau]} |\hat{S}_{T|X_j}(t|r) - S_{T|X_j}(t|r)| > \epsilon\right) \\ & \leq d_3 R_j \exp(-d_4 \epsilon^2 \theta_1^{25} \min_r n_r R_j^{-2}) \\ & \leq d_3 R \exp(-d_4 \epsilon^2 \theta_1^{25} \min_r n_r R^{-2}) \end{aligned}$$

where  $n_r$  is the subsample size of  $X_j = r$ . By condition (C6), we have  $\min_r n_r \geq n/R = n^{1-\kappa}$ . □

LEMMA 2: Under (C1)-(C5), for a categorical covariate  $X_j$  with  $R_j$  categories, we have

$$P\left(\max_{1 \leq r \leq R_j} \sup_{t \in [0, \tau]} |\hat{f}_{T|X_j}(t|r) - f_{T|X_j}(t|r)| > \epsilon\right) \leq d_3 R \exp\left(-\frac{1}{4} d_4 \epsilon^2 \theta_1^{25} n^{1-3\kappa} h_n^2\right),$$

where  $R = \max_{1 \leq j \leq p} R_j$ .

*Proof.* Note that

$$\begin{aligned}
& \sup_{t \in [0, \tau]} |\hat{f}_{T|X_j}(t|r) - f_{T|X_j}(t|r)| \\
\leq & \sup_{t \in [0, \tau]} \left| - \int K_{h_n}(t-s) d\hat{S}_{T|X_j}(s|r) + \int K_{h_n}(t-s) dS_{T|X_j}(s|r) \right| \\
& + \sup_{t \in [0, \tau]} \left| - \int K_{h_n}(t-s) dS_{T|X_j}(s|r) - f_{T|X_j}(t|r) \right| \\
\leq & \sup_{t \in [0, \tau]} \left| - \int K_{h_n}(t-s) d[\hat{S}_{T|X_j}(s|r) - S_{T|X_j}(s|r)] \right| \\
& + \sup_{t \in [0, \tau]} \left| - \int K_{h_n}(t-s) dS_{T|X_j}(s|r) - f_{T|X_j}(t|r) \right| \\
=: & I_1 + I_2.
\end{aligned}$$

Assume that there exists a constant  $C_0$  such that  $|K| \leq C_0$ . Integration by parts yields that

$$\begin{aligned}
I_1 &= \left| - [\hat{S}_{T|X_j}(s|r) - S_{T|X_j}(s|r)] K_{h_n}(t-s) \Big|_0^\tau + \int [\hat{S}_{T|X_j}(s|r) - S_{T|X_j}(s|r)] dK_{h_n}(t-s) \right| \\
&\leq C_0 h_n^{-1} \sup_{t \in [0, \tau]} |\hat{S}_{T|X_j}(t|r) - S_{T|X_j}(t|r)| + V_K h_n^{-1} \sup_{t \in [0, \tau]} |\hat{S}_{T|X_j}(t|r) - S_{T|X_j}(t|r)| \\
&\leq (C_0 + V_K) h_n^{-1} \max_r \sup_{t \in [0, \tau]} |\hat{S}_{T|X_j}(t|r) - S_{T|X_j}(t|r)|.
\end{aligned}$$

For  $I_2$ , we have

$$\begin{aligned}
I_2 &= \sup_{t \in [0, \tau]} \left| \int K_{h_n}(s-t) f_{T|X_j}(s|r) ds - f_{T|X_j}(t|r) \right| \\
&= \sup_{t \in [0, \tau]} \left| \int K(u) f_{T|X_j}(t + u h_n | r) du - f_{T|X_j}(t|r) \right| = O(h_n^2).
\end{aligned}$$

Note that  $P(I_2 > \epsilon/2) = 0$ . Therefore, by Lemma 1, we have

$$\begin{aligned}
& P(\max_r \sup_{t \in [0, \tau]} |\hat{f}_{T|X_j}(t|r) - f_{T|X_j}(t|r)| > \epsilon) \\
&\leq P(I_1 > \frac{\epsilon}{2}) + P(I_2 > \frac{\epsilon}{2}) \\
&\leq P(\sup_{t \in [0, \tau]} |\hat{S}_{T|X_j}(t|r) - S_{T|X_j}(t|r)| > \frac{\epsilon h_n}{2}) \\
&\leq d_3 R \exp\left(-\frac{1}{4} d_4 \epsilon^2 \theta_1^{25} n^{1-3\kappa} h_n^2\right).
\end{aligned}$$

□

**LEMMA 3:** Under (C1)-(C5), for a categorical covariate  $X_j$  with  $R_j$  categories, i.e.,  $X_j =$

$r$  for  $1 \leq r \leq R_j$ , we have

$$P(|\widehat{\mathcal{I}}_j^{(\gamma)} - \mathcal{I}_j^{(\gamma)}| > \epsilon) \leq d_6 R \exp(-d_5 \epsilon^2 n^{1-3\kappa} h_n^2),$$

where  $d_5$  and  $d_6$  are positive constants.

*Proof.* Note that

$$\begin{aligned} & |\widehat{\mathcal{I}}_j^{(\gamma)} - \mathcal{I}_j^{(\gamma)}| \\ = & \left| \max_{r_1, r_2} \sup_{t \in [0, \tau]} \left| \int_0^t \hat{f}_{T|X_j}^\gamma(s|X_j = r_1) ds - \int_0^t \hat{f}_{T|X_j}^\gamma(s|X_j = r_2) ds \right| \right. \\ & \left. - \max_{r_1, r_2} \sup_{t \in [0, \tau]} \left| \int_0^t f_{T|X_j}^\gamma(s|X_j = r_1) ds - \int_0^t f_{T|X_j}^\gamma(s|X_j = r_2) ds \right| \right| \\ \leq & \max_{r_1} \sup_{t \in [0, \tau]} \left| \int_0^t \hat{f}_{T|X_j}^\gamma(s|X_j = r_1) ds - \int_0^t f_{T|X_j}^\gamma(s|X_j = r_1) ds \right| \\ & + \max_{r_2} \sup_{t \in [0, \tau]} \left| \int_0^t \hat{f}_{T|X_j}^\gamma(s|X_j = r_2) ds - \int_0^t f_{T|X_j}^\gamma(s|X_j = r_2) ds \right| \\ =: & I_{31} + I_{32}. \end{aligned}$$

By Lemma 2 and the mean value theorem,

$$\begin{aligned} & \hat{f}_{T|X_j}^\gamma(t|X_j = r_1) - f_{T|X_j}^\gamma(t|X_j = r_1) \\ = & \{f_{T|X_j}(t|X_j = r_1) + [\hat{f}_{T|X_j}(t|X_j = r_1) - f_{T|X_j}(t|X_j = r_1)]\}^\gamma - f_{T|X_j}^\gamma(t|X_j = r_1) \\ = & \gamma \{f_{T|X_j}(t|X_j = r_1) + \zeta^* [\hat{f}_{T|X_j}(t|X_j = r_1) - f_{T|X_j}(t|X_j = r_1)]\}^{\gamma-1} \\ & \times [\hat{f}_{T|X_j}(t|X_j = r_1) - f_{T|X_j}(t|X_j = r_1)] \\ =: & \gamma \psi(\zeta^*) [\hat{f}_{T|X_j}(t|X_j = r_1) - f_{T|X_j}(t|X_j = r_1)], \end{aligned}$$

where  $\zeta^*$  is a constant between 0 and 1. For  $\gamma > 1$ , we have

$$\begin{aligned} |\psi(\zeta^*)| &= |\{f_{T|X_j}(t|X_j = r_1) + \zeta^* [\hat{f}_{T|X_j}(t|X_j = r_1) - f_{T|X_j}(t|X_j = r_1)]\}^{\gamma-1}| \\ &\leq [3f_{T|X_j}(t|X_j = r_1)]^{\gamma-1} \\ &\leq 3^{\gamma-1} \left[ \sup_{t \in [0, \tau]} f_{T|X_j}(t|X_j = r_1) \right]^{\gamma-1}, \end{aligned}$$

and for  $\gamma < 1$ , we have

$$\begin{aligned} |\psi(\zeta^*)| &= |\{f_{T|X_j}(t|X_j = r_1) + \zeta^*[\hat{f}_{T|X_j}(t|X_j = r_1) - f_{T|X_j}(t|X_j = r_1)]\}^{\gamma-1}| \\ &\leq \left[ \frac{1}{2} f_{T|X_j}(t|X_j = r_1) \right]^{\gamma-1} \\ &\leq \left( \frac{1}{2} \right)^{\gamma-1} \left[ \inf_{s \in [0, \tau]} f_{T|X_j}(t|X_j = r_1) \right]^{\gamma-1}. \end{aligned}$$

Let

$$G_1(\gamma) = \begin{cases} 3^{\gamma-1} [\sup_{t \in [0, \tau]} f_{T|X_j}(t|X_j = r_1)]^{\gamma-1}, & \text{if } \gamma > 1, \\ 1, & \text{if } \gamma = 1, \\ (\frac{1}{2})^{\gamma-1} [\inf_{t \in [0, \tau]} f_{T|X_j}(t|X_j = r_1)]^{\gamma-1}, & \text{if } \gamma < 1. \end{cases}$$

Then we have

$$\begin{aligned} I_{31} &= \max_{r_1} \sup_{t \in [0, \tau]} \left| \int_0^t \hat{f}_{T|X_j}^\gamma(s|X_j = r_1) ds - \int_0^t f_{T|X_j}^\gamma(s|X_j = r_1) ds \right| \\ &\leq \max_{r_1} \sup_{t \in [0, \tau]} \int_0^t \left| \hat{f}_{T|X_j}^\gamma(s|X_j = r_1) - f_{T|X_j}^\gamma(s|X_j = r_1) \right| ds \\ &\leq |\gamma| G_1(\gamma) \tau \max_r \sup_{t \in [0, \tau]} |\hat{f}_{T|X_j}(t|r) - f_{T|X_j}(t|r)|. \end{aligned}$$

Similarly,

$$I_{32} \leq |\gamma| G_2(\gamma) \tau \max_r \sup_{t \in [0, \tau]} |\hat{f}_{T|X_j}(t|r) - f_{T|X_j}(t|r)|,$$

where

$$G_2(\gamma) = \begin{cases} 3^{\gamma-1} [\sup_{t \in [0, \tau]} f_{T|X_j}(t|X_j = r_2)]^{\gamma-1}, & \text{if } \gamma > 1, \\ 1, & \text{if } \gamma = 1, \\ (\frac{1}{2})^{\gamma-1} [\inf_{t \in [0, \tau]} f_{T|X_j}(t|X_j = r_2)]^{\gamma-1}, & \text{if } \gamma < 1. \end{cases}$$

The result follows from Lemma 2. □

*Proof of Theorem 1.* By Lemma 3, we have

$$\begin{aligned}
P(\mathcal{M} \subset \widehat{\mathcal{M}}_1) &\geq P\left(|\widehat{\mathcal{I}}_j^{(\gamma)} - \mathcal{I}_j^{(\gamma)}| \leq cn^{-v}\right) \\
&\geq P\left(\max_{1 \leq j \leq p} |\widehat{\mathcal{I}}_j^{(\gamma)} - \mathcal{I}_j^{(\gamma)}| \leq cn^{-v}\right) \\
&\geq 1 - \sum_{j=1}^p P(|\widehat{\mathcal{I}}_j^{(\gamma)} - \mathcal{I}_j^{(\gamma)}| > cn^{-v}) \\
&\geq 1 - \sum_{j=1}^p \left[ d_6 R \exp\left(-\frac{1}{4}d_5 c^2 n^{1-3\kappa-2v} h_n^2\right) \right] \\
&= 1 - O(pn^\kappa) \exp\left(-\frac{1}{4}d_5 c^2 n^{1-3\kappa-2v} h_n^2\right) \\
&= 1 - O(p \exp\{-b_0 n^{1-3\kappa-2v} h_n^2 + \kappa \log n\}),
\end{aligned}$$

where  $b_0$  is a positive constant. □

*Proof of Corollary 1.* Under the assumption  $\sum_{j=1}^p \mathcal{I}_j^{(\gamma)} = O(\zeta)$ , it is easy to obtain that the cardinality of  $\{j : \mathcal{I}_j^{(\gamma)} \geq cn^{-v}\}$  is no greater than  $O(n^{\zeta+v})$ . Hence, on the set

$$\Omega_n = \left\{ \sup_{1 \leq j \leq p} |\widehat{\mathcal{I}}_j^{(\gamma)} - \mathcal{I}_j^{(\gamma)}| \leq cn^{-v} \right\},$$

we have

$$\{j : \widehat{\mathcal{I}}_j^{(\gamma)} \geq 2cn^{-v}\} \leq \{j : \mathcal{I}_j^{(\gamma)} \geq cn^{-v}\} = O(n^{\zeta+v}).$$

By Lemma 3, we have

$$P\left(\sup_{1 \leq j \leq p} |\widehat{\mathcal{I}}_j^{(\gamma)} - \mathcal{I}_j^{(\gamma)}| > cn^{-v}\right) \leq O(R) \exp(-d_5 \epsilon^2 n^{1-3\kappa-2v}).$$

□

Let  $q_{j(r)}$  be the  $r/R_j$  theoretical quantile of  $X_j$ , for  $r = 1, \dots, R_j$ . For notational simplicity, let  $\hat{J}_r = [\hat{q}_{j(r-1)}, \hat{q}_{j(r)})$  and  $J_r = [q_{j(r-1)}, q_{j(r)})$  in the following statements.

LEMMA 4: *For continuous covariate  $X_j$ , let  $\hat{S}_{T|X_j}(t|X_j \in \hat{J}_r)$  be the Kaplan-Meier estimator of the conditional survival function within the subsample  $X_j \in \hat{J}_r$ , and assume conditions (C1), (C5) and (C6) hold. Then,*

$$P\left(\max_r \sup_{t \in [0, \tau]} |\hat{S}_{T|X_j}(t|X_j \in \hat{J}_r) - S_{T|X_j}(t|X_j \in J_r)| > \epsilon\right) \leq d_7 R \exp(-d_8 \epsilon^2 n^{1-3\kappa-2\rho}),$$

for any  $1 \leq r \leq R_j$ , and  $R = \max_{1 \leq j \leq p} R_j$ , where  $d_7$  and  $d_8$  are positive constants.

*Proof.* By consistency of  $\hat{q}_{j(r)}$ , it is easy to obtain that,

$$F_{X_j}(\hat{q}_{j(r)}) - F_{X_j}(\hat{q}_{j(r-1)}) > 0.5[F_{X_j}(q_{j(r)}) - F_{X_j}(q_{j(r-1)})].$$

By the mean value theorem,

$$\begin{aligned} & |S_{T|X_j}(t|X_j \in \hat{J}_r) - S_{T|X_j}(t|X_j \in J_r)| \\ = & \left| \frac{P(T > t, X_j < \hat{q}_{j(r)}) - P(T > t, X_j < \hat{q}_{j(r-1)})}{F_{X_j}(\hat{q}_{j(r)}) - F_{X_j}(\hat{q}_{j(r-1)})} \right. \\ & \left. - \frac{P(T > t, X_j < q_{j(r)}) - P(T > t, X_j < q_{j(r-1)})}{F_{X_j}(q_{j(r)}) - F_{X_j}(q_{j(r-1)})} \right| \\ \leq & \left| \frac{P(T > t, X_j < \hat{q}_{j(r)}) - P(T > t, X_j < \hat{q}_{j(r-1)})}{F_{X_j}(\hat{q}_{j(r)}) - F_{X_j}(\hat{q}_{j(r-1)})} \right. \\ & \left. - \frac{P(T > t, X_j < q_{j(r)}) - P(T > t, X_j < q_{j(r-1)})}{F_{X_j}(\hat{q}_{j(r)}) - F_{X_j}(\hat{q}_{j(r-1)})} \right| \\ & + \left| \frac{P(T > t, X_j < q_{j(r)}) - P(T > t, X_j < q_{j(r-1)})}{F_{X_j}(\hat{q}_{j(r)}) - F_{X_j}(\hat{q}_{j(r-1)})} \right. \\ & \left. - \frac{P(T > t, X_j < q_{j(r)}) - P(T > t, X_j < q_{j(r-1)})}{F_{X_j}(q_{j(r)}) - F_{X_j}(q_{j(r-1)})} \right| \\ \leq & \frac{2}{F_{X_j}(q_{j(r)}) - F_{X_j}(q_{j(r-1)})} \left[ |P(T > t, X_j < \hat{q}_{j(r)}) - P(T > t, X_j < q_{j(r)})| \right. \\ & \left. + |P(T > t, X_j < \hat{q}_{j(r-1)}) - P(T > t, X_j < q_{j(r-1)})| \right] \\ & + \frac{2}{[F_{X_j}(q_{j(r)}) - F_{X_j}(q_{j(r-1)})]^2} [|F_{X_j}(\hat{q}_{j(r-1)}) - F_{X_j}(q_{j(r-1)})| + |F_{X_j}(\hat{q}_{j(r)}) - F_{X_j}(q_{j(r)})|] \\ =: & I_{41} + I_{42} + I_{43} + I_{44}. \end{aligned}$$

For  $I_{41}$ , we have

$$\begin{aligned} I_{41} &= \frac{2}{F_{X_j}(q_{j(r)}) - F_{X_j}(q_{j(r-1)})} |P(T > t, X_j < \hat{q}_{j(r)}) - P(T > t, X_j < q_{j(r)})| \\ &\leq \frac{2}{F_{X_j}(q_{j(r)}) - F_{X_j}(q_{j(r-1)})} \left| \int_t^\infty f_{T|X_j}(s|q_{j(r)}^*) f_{X_j}(q_{j(r)}^*) ds \right| \max_r |\hat{q}_{j(r)} - q_{j(r)}|, \end{aligned}$$

where  $q_{j(r)}^*$  lies between  $\hat{q}_{j(r)}$  and  $q_{j(r)}$ . Hence,

$$\begin{aligned}
& P\left(I_{41} > \frac{\epsilon}{8}\right) \\
& \leq P\left(\max_r |\hat{q}_{j(r)} - q_{j(r)}| > \frac{\epsilon[F_{X_j}(q_{j(r)}) - F_{X_j}(q_{j(r-1)})]}{16|\int_t^\infty f_{T|X_j}(s|q_{j(r)}^*)f_{X_j}(q_{j(r)}^*)ds|}\right) \\
& \leq b_2 R_j \exp(-b_1 n^{1-2\rho} \epsilon^2) \\
& \leq b_2 R \exp(-b_1 n^{1-2\rho} \epsilon^2),
\end{aligned}$$

where  $b_1$  and  $b_2$  are positive constants, and the second inequality is obtained by Lemma A.2 from Ni and Fang (2016). Similarly, we can have  $P(I_{4k} > \epsilon/8) \leq b_{2k} R \exp(-b_k n^{1-2\rho} \epsilon^2)$ , for  $k = 2, 3, 4$  and where  $b_k$  and  $b_{2k}$  are positive constants. Therefore, we have

$$\begin{aligned}
& P(\max_r \sup_{t \in [0, \tau]} |\hat{S}_{T|X_j}(t|X_j \in \hat{J}_r) - S_{T|X_j}(t|X_j \in J_r)| > \epsilon) \\
& \leq P(\max_r \sup_{t \in [0, \tau]} |\hat{S}_{T|X_j}(t|X_j \in \hat{J}_r) - S_{T|X_j}(t|X_j \in \hat{J}_r)| > \epsilon/2) \\
& \quad + P(\max_r \sup_{t \in [0, \tau]} |S_{T|X_j}(t|X_j \in \hat{J}_r) - S_{T|X_j}(t|X_j \in J_r)| > \epsilon/2) \\
& \leq d_3 R \exp(-d_4 (\epsilon/2)^2 \theta_2^{25} n^{1-3\kappa}) + \sum_{k=1}^4 P\left(I_{4k} > \frac{\epsilon}{8}\right) \\
& \leq d_7 R \exp(d_8 \epsilon^2 n^{1-3\kappa-2\rho}).
\end{aligned}$$

□

LEMMA 5: Under (C1)-(C4) and (C6), for a continuous covariate  $X_j$ , we have

$$P(\max_r \sup_{t \in [0, \tau]} |\hat{f}_{T|X_j}(t|X_j \in \hat{J}_r) - f_{T|X_j}(t|X_j \in J_r)| > \epsilon) \leq d_9 \exp(-d_{10} \epsilon^2 n^{1-3\kappa-2\rho-2\mu}),$$

where  $d_9, d_{10}$  are positive constants.

*Proof.* The proof of this lemma is similar to that of Lemma 2, and is omitted. □

LEMMA 6: Under (C1)-(C4) and (C6), for a continuous covariate  $X_j$ , we have

$$P(|\hat{\mathcal{I}}_j^{(\gamma)} - \mathcal{I}_j^{(\gamma)}| > \epsilon) \leq d_{11} R \exp(-d_{12} \epsilon^2 n^{1-3\kappa-2\rho-2\mu}),$$

where  $d_{11}, d_{12}$  are positive constants, and  $R = \max_{1 \leq j \leq p} R_j$ .



*Proof.* The proof of this lemma is similar to that of Lemma 3. By Lemmas 4 and 5, it is easy to obtain the conclusion.  $\square$

*Proof of Theorem 2.* By Lemma 6, the proof of this theorem is similar to that of Theorem 1, and hence is omitted.  $\square$

*Proof of Corollary 2.* The proof of it is similar to that of Corollary 1, and we omit it here.  $\square$

For simplicity, let  $\hat{J}_{ur} = [\hat{q}_{ju(r-1)}, \hat{q}_{ju(r)}]$ , and  $J_{ur} = [q_{ju(r-1)}, q_{ju(r)}]$ .

LEMMA 7: Under (C1)-(C4) and (C6), for a continuous covariate  $X_j$ , we have

$$P(|\tilde{\mathcal{I}}_j^{(\gamma)} - \mathcal{I}_{jo}^{(\gamma)}| > \epsilon) \leq d_{13}NR \exp(-d_{14}\epsilon^2 n^{1-3\kappa-2\rho-2\mu}),$$

where  $d_{13}, d_{14}$  are positive constants, and  $R = \max_{1 \leq j \leq p, 1 \leq u \leq N} R_{ju}$ .

*Proof.* Note that

$$\begin{aligned} & |\tilde{\mathcal{I}}_j^{(\gamma)} - \mathcal{I}_{jo}^{(\gamma)}| \\ & \leq \sum_{u=1}^N |\hat{\mathcal{I}}_{j, \Lambda_{ju}}^{(\gamma)} - \mathcal{I}_{j, \Lambda_{juo}}^{(\gamma)}| \\ & \leq \sum_{u=1}^N \left[ \max_{r_1} \sup_{t \in [0, \tau]} \left| \int_0^t \hat{f}_{T|X_j}^{\gamma}(s|X_j \in \hat{J}_{ur_1}) ds - \int_0^t f_{T|X_j}^{\gamma}(s|X_j \in J_{ur_1}) ds \right| \right. \\ & \quad \left. + \max_{r_2} \sup_{t \in [0, \tau]} \left| \int_0^t \hat{f}_{T|X_j}^{\gamma}(s|X_j \in \hat{J}_{ur_2}) ds - \int_0^t f_{T|X_j}^{\gamma}(s|X_j \in J_{ur_2}) ds \right| \right]. \end{aligned}$$

By Lemma 6, similar to the proof of Lemma 3, it is easy to obtain the conclusion.  $\square$

*Proof of Theorem 3.* By Lemma 7, the proof is similar to that of Theorem 1, and hence is omitted.  $\square$

*Proof of Corollary 3.* The proof is similar to that of Corollary 1, and is omitted.  $\square$

## 2. On the Choice of bandwidth $h_n$

From Theorem 2.2 of Lo et al. (1989), we can obtain that

$$\begin{aligned} E[\hat{f}_T(t)] &= f(t) + \frac{f''(t)h_n^2}{2} \int s^2 K(s) ds + o(h_n) + o((nh_n)^{-1/2}), \\ Var[\hat{f}_T(t)] &= \frac{1}{nh_n} \frac{f(t)}{P(Y_i > t)} \int K^2(s) ds + o((nh_n)^{-1}). \end{aligned}$$

Obviously there is a trade-off: when  $h_n$  increases, the bias becomes larger, while the variance become smaller; when  $h_n$  decreases, the bias becomes smaller, while the variance become larger. An optimal  $h_n$  could be selected by minimizing the mean squared error (MSE) of  $\hat{f}(t)$ , which strikes a balance between bias and variance:

$$\text{MSE} = \left[ \frac{f''(t)h_n^2}{2} \int s^2 K(s) ds \right]^2 + \frac{1}{nh_n} \frac{f(t)}{P(Y_i > t)} \int K^2(s) ds + o((nh_n)^{-1}) + o(h_n^4).$$

It follows that the minimal of MSE could be achieved when  $h_n = O(n^{-1/5})$ . That is, the optimal bandwidth is in the order  $O(n^{-1/5})$ .

To explore how the bandwidth can impact the results with various  $\gamma$ , we present in Figure S1 the boxplots of the MMS for IPOD in Example 1 with  $(n, p) = (500, 1000)$ ,  $\gamma = 0.1, 0.5, 0.8, 1, 1.2, 1.5, 2.0, 2.5, 3.0$ , and  $h_n = h_0 n^{-1/5}$  with  $h_0 = 0.4, 2, 5, 10$ , respectively. Figure S1 shows a U-shaped relationship between  $\gamma$  and MMS. The impact of the bandwidth appeared negligible unless the bandwidth was too narrow or too wide. In addition, if a  $\gamma$  was too distant from 1, it did not help detect differences in distributions and produced less meaningful results. On the other hand, using  $\gamma$  from 0.7 to 1.5 might help IPOD detect early or late differences.

[Supplemental Material, Figure 1 about here.]

### 3. Additional Numerical Results

Example 5. *The survival time was generated from a Cox model,  $\lambda(t|\mathbf{X}) = 0.2 \exp(\boldsymbol{\beta}^T \mathbf{X})$  where the covariates  $X_j$  were from a multivariate normal distribution and  $\boldsymbol{\beta} = (\mathbf{0.3}_5^T, \mathbf{0}_{p-5}^T)^T$ . For the true covariance, we considered an exchangeable correlation structure with an equal correlation of 0.5. The censoring times  $C_i$  were independently generated from a uniform distribution  $U[0, c]$ , with  $c$  chosen to give approximately 20% and 50% of censoring proportions.*

Example 5\*. *The setup was the same as in Example 5 except that the censoring times  $C_i$  were*

covariate-dependent and generated from  $\lambda_C(t|\mathbf{X}) = c \exp(\boldsymbol{\beta}^T \mathbf{X})$ , where  $\boldsymbol{\beta} = (\mathbf{0.3}_2^T, \mathbf{0}_{p-2}^T)^T$ , and  $c$  was chosen to give approximately 20% and 50% of censoring proportions.

[Supplemental Material, Table 1 about here.]

Table S1 indicates that when the censoring time depended on covariates (Example 5\*), the results were not impacted, suggesting the validity of the results under dependent censoring.

[Supplemental Material, Table 2 about here.]

Table S2 reports the average computing time under Example 1 by various screening methods. It shows that the IPOD procedure is on par with the competing methods, but more computationally efficient than SII and CRIS, the nonparametric competitors.

## References

- Dabrowska, D. M. (1989). Uniform consistency of the kernel conditional Kaplan-Meier estimate. *Annals of Statistics* **17**, 1157–1167.
- Ni, L. and Fang, F. (2016). Entropy-based model-free feature screening for ultrahigh-dimensional multiclass classification. *Journal of Nonparametric Statistics* **28**, 515–530.

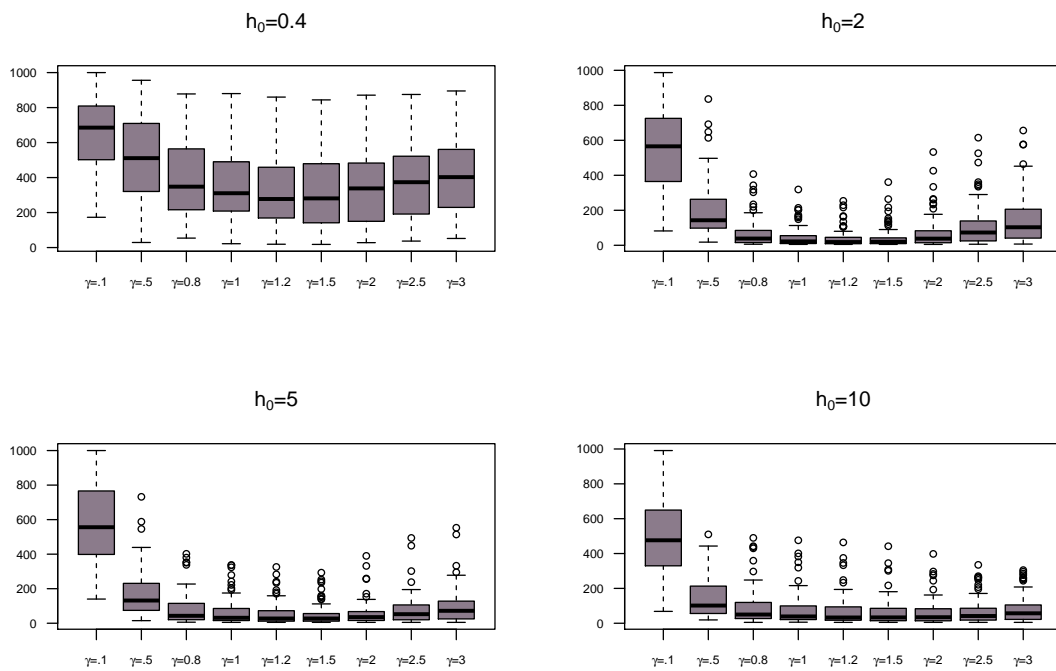

**Figure S1:** The boxplots of MMS obtained from IPOD with various  $\gamma$ 's and bandwidths under Example 1.

Table S1: Comparisons of competing methods with  $(n, p) = (500, 1000)$  in terms of MMS (with interquartile range in parentheses), TPR, and PIT

| Method                  | MMS     | TPR    | PIT  | MMS       | TPR    | PIT  |
|-------------------------|---------|--------|------|-----------|--------|------|
| Example 5               |         | CR=20% |      |           | CR=50% |      |
| IPOD ( $\gamma = .8$ )  | 46 (73) | 0.93   | 0.71 | 89 (153)  | 0.86   | 0.47 |
| IPOD ( $\gamma = 1$ )   | 29 (51) | 0.96   | 0.80 | 66 (116)  | 0.90   | 0.56 |
| IPOD ( $\gamma = 1.2$ ) | 23 (42) | 0.97   | 0.86 | 49 (83)   | 0.92   | 0.66 |
| PSIS                    | 6 (5)   | 1.00   | 0.99 | 14 (28)   | 0.98   | 0.90 |
| CRIS                    | 7 (6)   | 1.00   | 0.98 | 30 (70)   | 0.94   | 0.74 |
| CS                      | 5 (1)   | 1.00   | 1.00 | 8 (10)    | 0.99   | 0.96 |
| SII                     | 13 (21) | 0.99   | 0.94 | 20 (31)   | 0.98   | 0.90 |
| Example 5*              |         | CR=20% |      |           | CR=50% |      |
| IPOD ( $\gamma = 0.8$ ) | 46 (63) | 0.94   | 0.70 | 100 (162) | 0.85   | 0.44 |
| IPOD ( $\gamma = 1$ )   | 32 (45) | 0.96   | 0.81 | 70(124)   | 0.89   | 0.54 |
| IPOD ( $\gamma = 1.2$ ) | 23 (47) | 0.97   | 0.85 | 58 (98)   | 0.91   | 0.63 |
| PSIS                    | 6 (7)   | 1.00   | 0.98 | 15 (27)   | 0.98   | 0.88 |
| CRIS                    | 7 (9)   | 1.00   | 0.98 | 30 (62)   | 0.95   | 0.78 |
| CS                      | 5 (1)   | 1.00   | 1.00 | 7 (9)     | 0.99   | 0.97 |
| SII                     | 24 (69) | 0.95   | 0.77 | 273 (330) | 0.70   | 0.15 |

Table S2: Average runtime (seconds) of different screening methods in Example 1 on a CPU with 2.9 GHz Intel Core i5 and 8GB of memory

|                         | PSIS  | CS    | CRIS   | SII     | IPOD  |
|-------------------------|-------|-------|--------|---------|-------|
| $(n, p) = (500, 1000)$  | 3.59  | 3.17  | 127.55 | 356.92  | 5.60  |
| $(n, p) = (300, 10000)$ | 29.21 | 28.74 | 458.28 | 1259.82 | 40.01 |
